# Supplementary material
Source: Royal Society of Chemistry journal article supplement (doi:10.1039/d6ta00748a)
Supplement: d6ta00748a1.pdf [file d6ta00748a1.pdf]

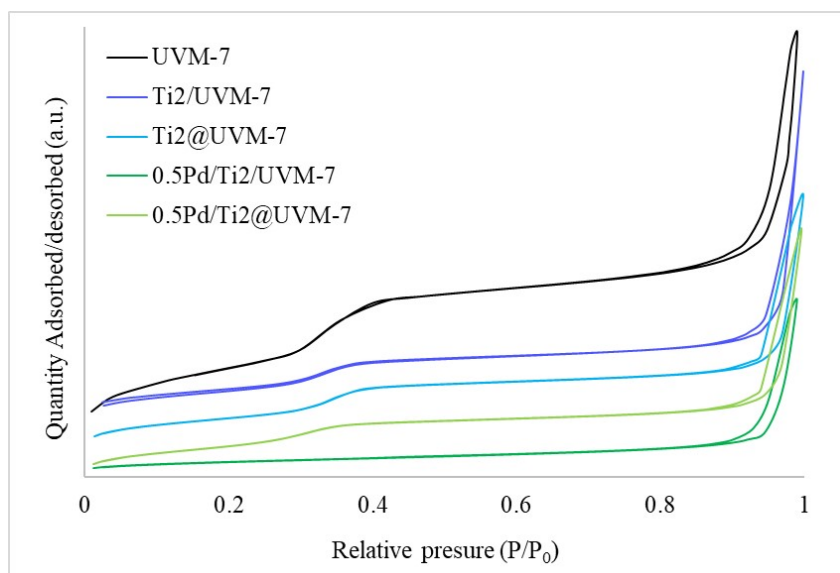

Figure S3.  $N_2$  adsorption-desorption isotherms of the UVM-7 investigated catalysts.

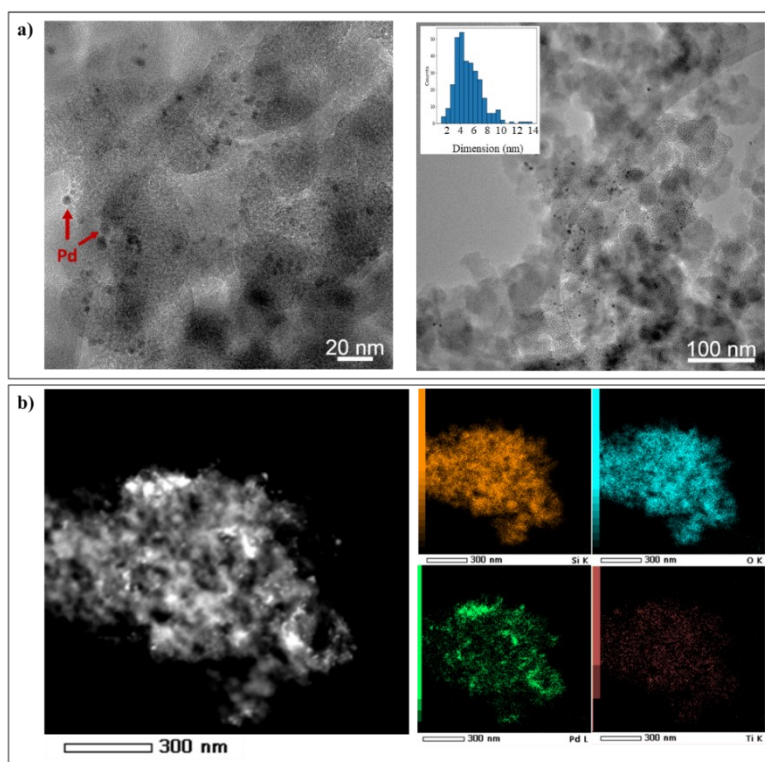

Figure S4. **a)** TEM images taken at various magnifications of the sample  $0.5\text{Pd}/\text{Ti}_2@UVM-7$  and the histogram showing the size distribution of the Pd nanoparticles and **b)** STEM dark field images and EDX mapping of the  $0.5\text{Pd}/\text{Ti}_2@UVM-7$  showing the elemental distribution of Si, O, Pd, Ti.

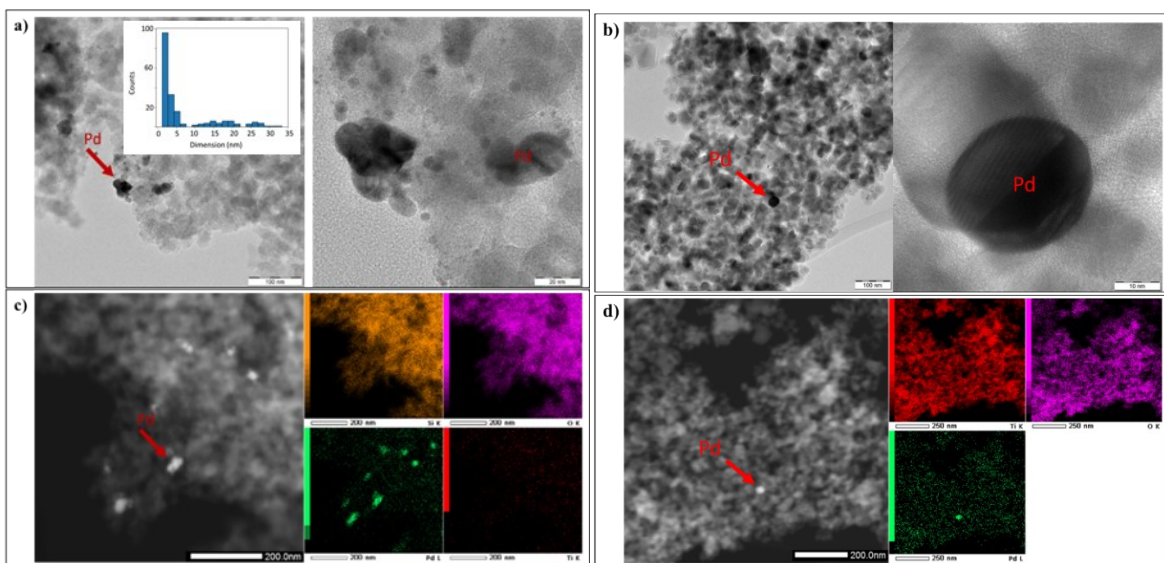

Figure S5. TEM images taken at various magnifications of the sample **a)** 0.5 Pd/UVM-7 and **b)** 0.5Pd/TiO<sub>2</sub>; STEM dark field images and EDX mapping of the sample **c)** 0.5Pd/UVM-7 and **d)** 0.5Pd/TiO<sub>2</sub> showing the elemental distribution of Si, O, Pd and Ti.

Table S1. Pd crystallite size determined from XRD and TEM.

| Entry | Material                     | Pd crystallite size * (nm) | Pd crystallite size # (nm) |
|-------|------------------------------|----------------------------|----------------------------|
| 1     | 0.5 Pd/Ti <sub>2</sub> @UVM7 | 8                          | 1-14 (average 5.4)         |
| 2     | 0.5Pd/Ti <sub>2</sub> /UVM7  | u.d.l.                     | <2                         |
| 3     | 0.5Pd/UVM-7                  | u.d.l.                     | 1-33 (average 6.9)         |
| 4     | 0.5Pd/TiO <sub>2</sub>       | u.d.l.                     | u.d.l. (30 – rarely)       |

u.d.l.= under detection limit; \*noble metal crystal size as calculated from XRD; #particle size values as measured from TEM images.

Table S2. EDX chemical composition determined from SEM analysis.

| Entry | Material                     | Chemical element (Atom %) |      |     |     | Si/Ti <sup>a)</sup> | Si/Ti <sup>b)</sup> |
|-------|------------------------------|---------------------------|------|-----|-----|---------------------|---------------------|
|       |                              | O                         | Si   | Ti  | Pd  |                     |                     |
| 1     | Ti <sub>2</sub> @UVM-7       | 73.9                      | 25.5 | 0.6 | -   | 70                  | 42.0                |
| 2     | 0.5Pd/Ti <sub>2</sub> @UVM-7 | 74.6                      | 24.5 | 0.7 | 0.2 | 70                  | 35.0                |
| 3     | UVM-7                        | 73.7                      | 26.3 | -   | -   | -                   | -                   |
| 4     | Ti <sub>2</sub> /UVM-7       | 73.9                      | 25.7 | 0.4 | -   | 67                  | 64.0                |
| 5     | 0.5Pd/Ti <sub>2</sub> /UVM-7 | 71.7                      | 27.6 | 0.5 | 0.2 | 67                  | 55.2                |
| 6     | 0.5Pd/UVM-7                  | 56.0                      | 43.5 | -   | 0.5 | -                   | -                   |
| 7     | 0.5Pd/TiO <sub>2</sub>       | 29.0                      | 70.3 | -   | 0.7 | -                   | -                   |

<sup>a)</sup> Si/Ti atomic ratio in the mother liquor (as added into the preparation step);

<sup>b)</sup> Si/Ti atomic ratio obtained from EDX measurements.

Table S3. Surface elemental composition as determined from XPS.

| Entry | Material                     | Chemical element (Atom %) |       |      |      |
|-------|------------------------------|---------------------------|-------|------|------|
|       |                              | O                         | Si    | Ti   | Pd   |
| 1     | Ti <sub>2</sub> @UVM-7       | 71.90                     | 27.90 | 0.20 | -    |
| 2     | 0.5Pd/Ti <sub>2</sub> @UVM-7 | 70.93                     | 28.72 | 0.31 | 0.04 |
| 3     | Ti <sub>2</sub> /UVM-7       | 71.40                     | 28.30 | 0.30 | -    |
| 4     | 0.5Pd/Ti <sub>2</sub> /UVM7  | 70.05                     | 29.70 | 0.17 | 0.08 |

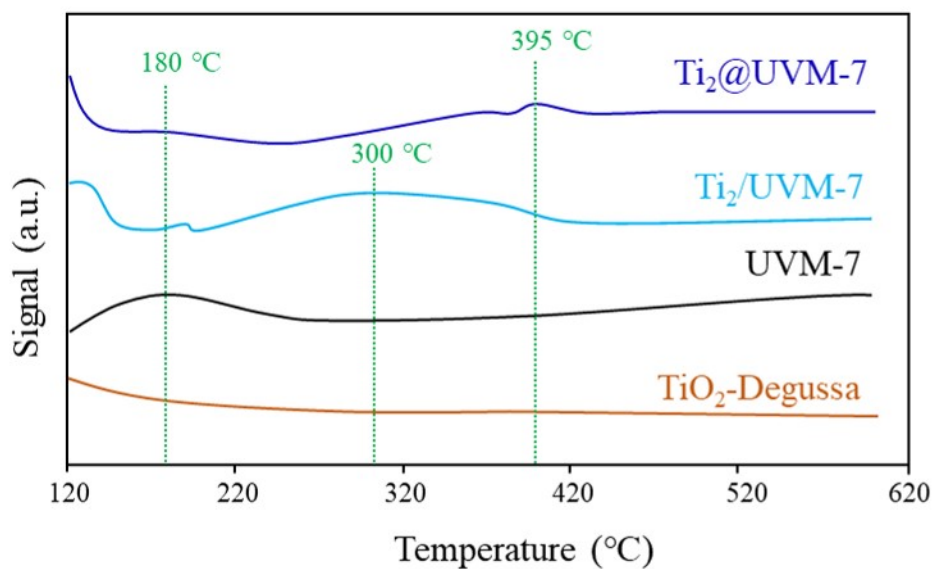

Figure S6. NH<sub>3</sub>-Temperature programmed desorption measured for the investigated supports.

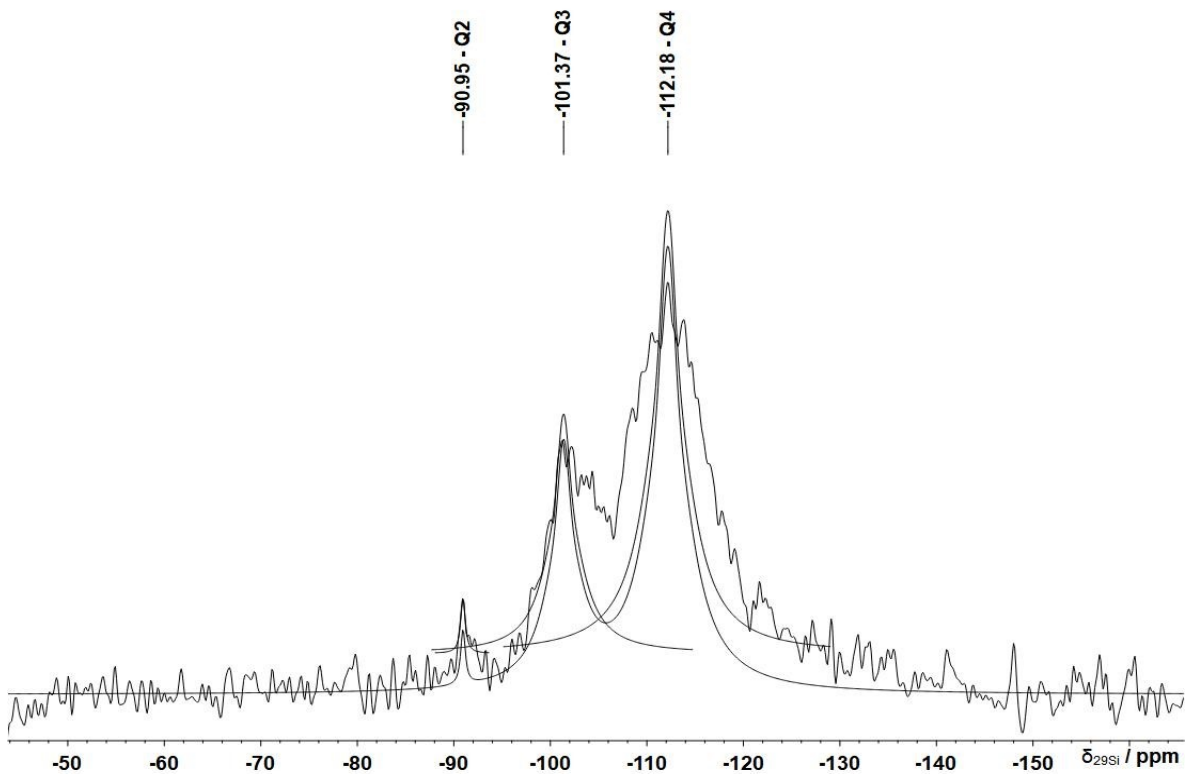

Figure S7.  $^{29}\text{Si}$  MAS NMR spectra of UVM-7

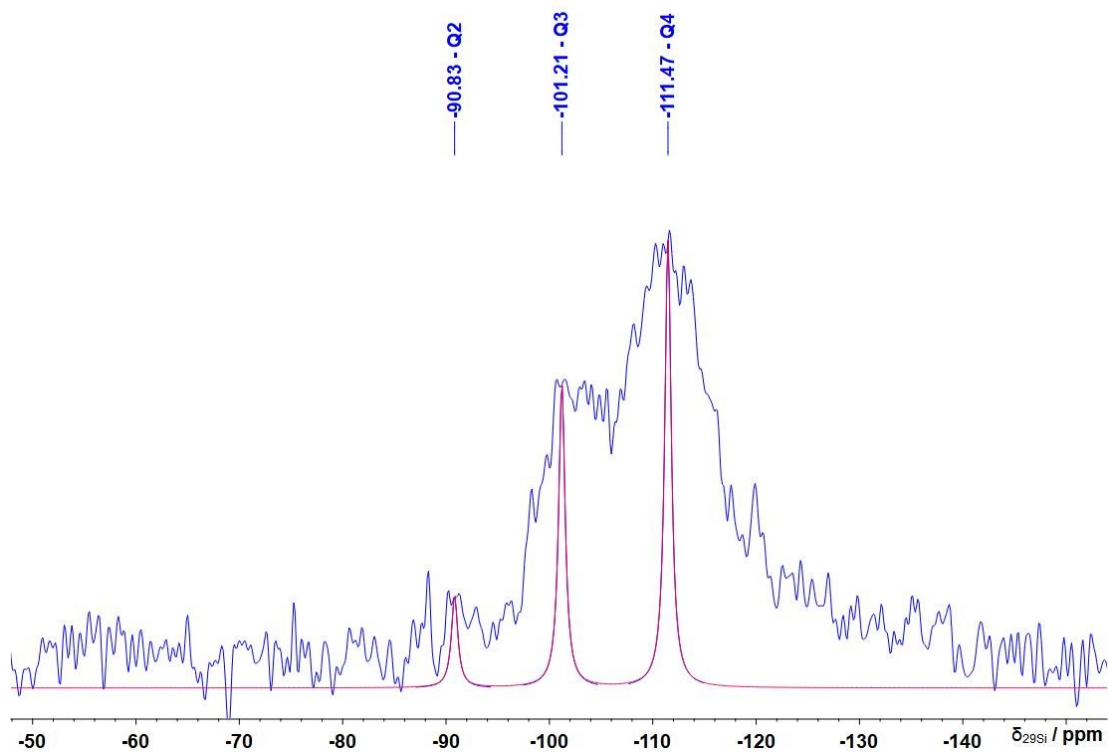

Figure S8.  $^{29}\text{Si}$  MAS NMR spectra of  $\text{Ti}_2/\text{UVM-7}$

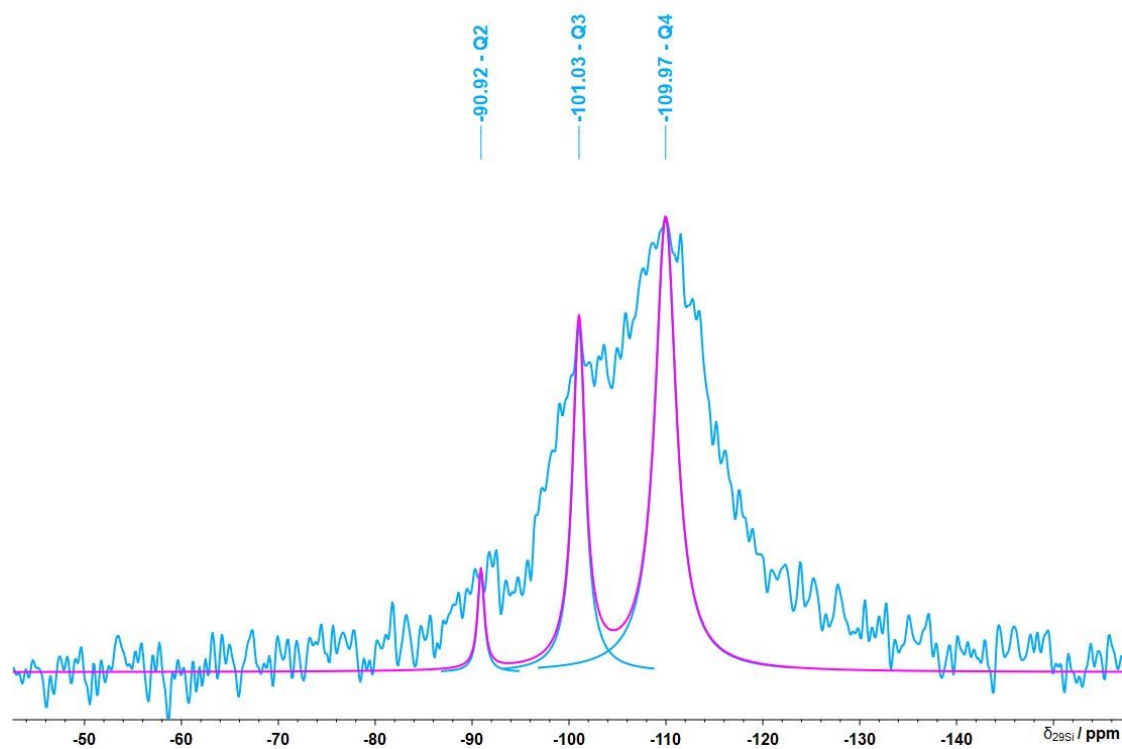

Figure S9.  $^{29}\text{Si}$  MAS NMR spectra of  $\text{Ti}_2\text{@UVM-7}$

Table S4. Comparative Q4 chemical shifts

| Sample                 | Q <sup>4</sup> Chemical shift ( $\delta$ , ppm) | Observed $\Delta\delta$ (vs UVM-7) |
|------------------------|-------------------------------------------------|------------------------------------|
| UVM-7                  | -112.18                                         | -                                  |
| Ti <sub>2</sub> /UVM-7 | -111.47                                         | + 0.71                             |
| Ti <sub>2</sub> @UVM-7 | -109.97                                         | + 2.21                             |

Table S5. Blank and support reaction tests.

| Entry | Catalyst               | Reaction time (h) | Conv. (%) | Selectivity (%) |      |      |            |
|-------|------------------------|-------------------|-----------|-----------------|------|------|------------|
|       |                        |                   | CAL       | HCAL            | HCOL | HCDA | CDA        |
| 1     | -                      | 24                | <b>14</b> | 0               | 0    | 0    | <b>100</b> |
| 2     | UVM-7                  | 24                | <b>26</b> | 0               | 0    | 0    | <b>100</b> |
| 3     | Ti <sub>2</sub> @UVM-7 | 24                | <b>31</b> | 0               | 0    | 0    | <b>100</b> |
| 4     | Ti <sub>2</sub> /UVM-7 | 24                | <b>28</b> | 0               | 0    | 0    | <b>100</b> |

Table S6. Reaction time influence on the performances of the investigated catalysts with 0.5%Pd.

| Entry | Catalyst                          | Reaction time (h) | Conv. (%)  | Selectivity (%) |      |      |      |     |
|-------|-----------------------------------|-------------------|------------|-----------------|------|------|------|-----|
|       |                                   |                   |            | CAL             | HCAL | HCOL | HCDA | CDA |
| 1     | <b>0.5Pd/Ti<sub>2</sub>@UVM-7</b> | 1                 | <b>37</b>  | 74              | 0    | 0    | 26   | -   |
| 2     |                                   | 2                 | <b>100</b> | 75              | 0    | 25   | 0    | -   |
| 3     |                                   | 4                 | <b>100</b> | 50              | 0    | 50   | 0    | -   |
| 4     |                                   | 6                 | <b>100</b> | 70              | 0    | 30   | 0    | -   |
| 5     |                                   | 8                 | <b>100</b> | 68              | 2    | 30   | 0    | -   |
| 7     |                                   | 12                | <b>100</b> | 54              | 4    | 42   | 0    | -   |
| 8     |                                   | 24                | <b>100</b> | 49              | 6    | 45   | 0    | -   |
| 9     | <b>0.5Pd/Ti<sub>2</sub>/UVM-7</b> | 0.16              | <b>100</b> | 98.8            | 0    | 1.2  | 0    | -   |
| 10    |                                   | 0.5               | <b>100</b> | 98.7            | 0    | 1.3  | 0    | -   |
| 11    |                                   | 1                 | <b>100</b> | 98.1            | 0    | 1.9  | 0    | -   |
| 12    |                                   | 2                 | <b>100</b> | 96              | 0    | 4    | 0    | -   |
| 13    |                                   | 4                 | <b>100</b> | 94              | 0    | 6    | 0    | -   |
| 14    |                                   | 8                 | <b>100</b> | 90              | 0    | 10   | 0    | -   |
| 15    |                                   | 24                | <b>100</b> | 73              | 3    | 24   | 0    | -   |
| 16    | <b>0.5Pd/TiO<sub>2</sub></b>      | 0.16              | <b>22</b>  | 85              | 1    | 3    | 11   | 0   |
| 17    |                                   | 0.5               | <b>75</b>  | 89              | 1    | 8    | 2    | 0   |
| 18    |                                   | 1                 | <b>94</b>  | 83              | 2    | 14   | 1    | 0   |
| 19    |                                   | 2                 | <b>97</b>  | 79              | 2.4  | 18   | 0.6  | 0   |
| 20    |                                   | 4                 | <b>100</b> | 67              | 4    | 29   | 0    | 3   |
| 21    |                                   | 24                | <b>100</b> | 24              | 42   | 31   | 0    | 3   |
| 22    | <b>0.5Pd/UVM-7</b>                | 0.16              | <b>93</b>  | 98              | <1   | 1    | 0    | 0   |
| 23    |                                   | 0.5               | <b>97</b>  | 94              | <1   | 2    | 0    | 3   |
| 24    |                                   | 1                 | <b>100</b> | 92.5            | <1   | 2.5  | 0    | 4   |
| 25    |                                   | 2                 | <b>100</b> | 92              | <1   | 3    | 0    | 4   |
| 26    |                                   | 4                 | <b>100</b> | 87              | 1    | 8    | 0    | 4   |
| 27    |                                   | 24                | <b>100</b> | 60              | 20   | 16   | 0    | 4   |

Reaction conditions: 0.1 mmoles of CAL, 10 mg of catalyst, 5 mL of ethanol, 140 °C, 25 atm H<sub>2</sub> pressure.

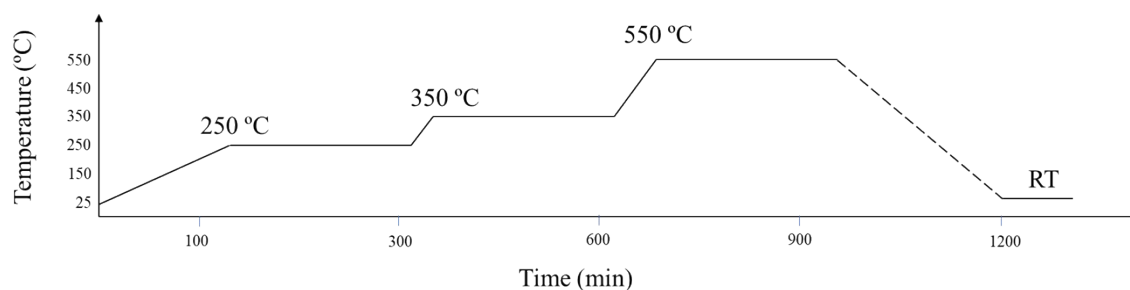

Scheme S1. Calcination heating ramp used for Ti<sub>2</sub>@UVM-7 and UVM-7.
